# 1 Syndromic surveillance during 2022 Uganda martyrs' commemoration

2 **Authors:** Mackline Ninsiima<sup>1\*</sup>, Mercy W. Wanyana<sup>1</sup>, Thomas Kiggundu<sup>1</sup>, Patrick King<sup>1</sup>,  
3 Bernard Lubwama<sup>2</sup>, Richard Migisha<sup>1</sup>, Lilian Bulage<sup>1</sup>, Daniel Kadobera<sup>1</sup>, Alex Rioplexus Ario<sup>1</sup>

## 4 Institution affiliations

5 <sup>1</sup>Uganda Public Health Fellowship Program, Uganda National Institute of Public Health,  
6 Kampala, Uganda

7 <sup>2</sup>Division of Integrated Epidemiology and Surveillance, Ministry of Health, Kampala, Uganda

8 **Correspondence\*:** Email: [mninsiima@uniph.go.ug](mailto:mninsiima@uniph.go.ug), [nmackline@musph.ac.ug](mailto:nmackline@musph.ac.ug)

## 9 Abstract

10 Mass gatherings frequently include close, prolonged interactions between people, which  
11 presents opportunities for infectious disease transmission. Over 20,000 pilgrims gathered at  
12 Namugongo Catholic and Protestant shrines to commemorate 2022 Uganda Martyr's Day.  
13 We described syndromes suggestive of key priority diseases particularly COVID-19 and viral  
14 hemorrhagic fever (VHF) among visiting pilgrims during May 25–June 5, 2022. A suspected  
15 COVID-19 case was defined as  $\geq 2$  signs or symptoms of: fever  $>37.5^{\circ}\text{C}$ , flu, cough, and  
16 difficulty in breathing whereas a suspected VHF case was defined as fever  $>37.5^{\circ}\text{C}$  and  
17 unexplained bleeding among pilgrims who visited Namugongo Catholic and Protestant  
18 shrines from May 25 to June 5, 2022. Pilgrims were sampled systematically at entrances and  
19 demarcated zonal areas to participate in the survey. Additionally, we extracted secondary data  
20 on pilgrims who sought emergency medical services from Health Management Information  
21 System registers. Descriptive analysis was conducted to identify syndromes suggestive of key  
22 priority diseases based on signs and symptoms. Among 1,350 pilgrims interviewed, 767 (57%)  
23 were female. The mean age was 37.9 ( $\pm 17.9$ ) years. Nearly all pilgrims 1,331 (98.6%) were  
24 Ugandans. A total of 236 (18%) reported  $\geq 1$  case definition symptom and 25 (2%) reported  
25  $\geq 2$  symptoms. Twenty-two (1.6%) were suspected COVID-19 cases and three (0.2%) were  
26 suspected VHF cases from different regions of Uganda. Among 5,582 pilgrims who sought

27 medical care from tents, 538 (9.6%) had suspected COVID-19 and one had suspected VHF.  
28 Almost one in fifty pilgrims at the 2022 Uganda Martyrs' commemoration had at least one  
29 symptom of COVID-19 or VHF. Overall, we identified 4 Viral Hemorrhagic Fever and 560  
30 COVID-19 suspected cases during the 2022 Uganda Martyrs' commemoration. Intensified  
31 syndromic surveillance and planned laboratory testing capacity at mass gatherings is important  
32 for early detection of public health emergencies that could stem from such events.

33 **Keywords:** Syndromic surveillance, Mass gathering, Uganda

### 34 **Background**

35 According to the World Health Organization (WHO), a mass gathering is an event, either  
36 organized or spontaneous, characterized by concentration of people at a specific location for a  
37 specific purpose over a set period of time and has the potential to strain planning and  
38 response resources of the host country or community (1). During mass gatherings,  
39 overcrowding of attendees and influx of non-local travelers may present favourable and  
40 conducive environments for close, prolonged and frequent interactions increasing the  
41 opportunities for infectious disease transmission. What is quite challenging is that any adverse  
42 health outcome associated with mass gatherings would most likely be magnified by media and  
43 political attention. Furthermore, occurrence of a disease outbreak at or during an  
44 international mass gathering has an increased potential for spreading to neighboring countries  
45 or even globally; thus, the need for reporting under the 2005 International Health  
46 Regulations (2). Influx of people during mass gatherings impacts a strain on existing  
47 surveillance and response systems. This presents a challenge to the hosting community or  
48 country to strengthen surveillance and response systems during preparation, operational and  
49 post-event phases of mass gatherings.

50 Syndromic surveillance – the utilization of health-related data based on clinical observations  
51 and symptoms rather than confirmed diagnosis, can serve as an effective strategy for

52 appropriate real time monitoring, early detection and timely response to public health events  
53 during mass gatherings (1, 3, 4). A provisional diagnosis or a “syndrome” can be established  
54 through synthesis of a group of symptoms and clinical observations which consistently occur  
55 together. During mass gatherings, syndromic surveillance has been implemented through  
56 surveys – recording symptoms, review of medical registers completed by medical teams and  
57 utilization of automated alert systems; followed by real-time analysis of data to generate  
58 incident reports necessary for informing timely response actions (5). To date, syndromic  
59 surveillance has been utilized in several mass gathering settings: 2002 Winter Olympic Games  
60 in Salt Lake City; 2012 Summer Olympic and Paralympic Games in London; 8th Micronesian  
61 Games in 2014, 2015 Los Angeles Special Olympic World Games; religious mass gatherings in  
62 Southern India; 2016 Grand Magal of Touba in Senegal; and 2016 Arbaeenia mass gathering  
63 in Iraq (3, 5-8).

64 Every year, in June, pilgrims from Uganda and neighboring countries gather at Namugongo  
65 Catholic and Protestant shrines to commemorate the lives of Uganda Martyrs. In 2020 and  
66 2021, Uganda Martyrs’ Day was not physically commemorated due to stringent strategies  
67 deployed by Ministry of Health to curb the spread of the COVID-19 pandemic during mass  
68 gatherings. In February 2022, the Ugandan Government relaxed the restrictions that had been  
69 put in place to control COVID-19 thus approving full economy operation. Following the  
70 relaxation of the COVID-19 restrictions, catholic and protestant religious bodies were  
71 permitted to organize the commemoration of Uganda Martyr’s Day, a historical religious event  
72 that calls for a mass gathering at Namugongo Catholic and Protestant shrines from May 25 to  
73 June 5, 2022. Due to the distances people travel to attend this event, an infectious disease  
74 outbreak that starts during this mass gathering has high potential to spread to neighboring  
75 districts or even to other countries.

76 During the commemoration of the Uganda Martyrs in 2022, the Ministry of Health in  
77 collaboration with the Uganda Catholic and Protestant Medical Bureaus provided health

78 services, including on-site emergency medical services in designated tents from May 25 to June  
79 5, 2022. The Ministry of Health also provided Health Management Information System  
80 registers where data for pilgrims who sought medical care were captured by the medical teams  
81 to achieve harmonized reporting from the different institutions. Additionally, the National  
82 Rapid Response Team of the Ministry of Health were assigned to conduct syndromic  
83 surveillance for key priority diseases during the event. In this context, we described syndromes  
84 suggestive of key priority diseases among visiting pilgrims from May 25 to June 5, 2022 to  
85 inform future planning for mass gatherings in Uganda.

## 86 **Methods**

### 87 **Study design**

88 We adopted the cross-sectional study design to describe syndromes suggestive of key priority  
89 diseases among visiting pilgrims from May 25 to June 5, 2022.

### 90 **Study setting and study population**

91 This assessment was conducted among over 20,000 visiting pilgrims from Uganda and  
92 neighboring countries gathered at Namugongo Catholic and Protestant shrines located in  
93 Namugongo Division, Wakiso District, Uganda. On-site emergency medical services were  
94 provided in designated tents from May 25 to June 5, 2022 by medical teams comprising  
95 emergency medicine specialists, doctors, nurses, laboratory attendants, and ambulance teams  
96 from Ministry of Health, Mulago National Referral Hospital, St. Francis Hospital Nsambya,  
97 Uganda Martyrs Hospital Rubaga, Uganda People's Defence Forces, Uganda Police Force,  
98 Uganda Red Cross Society, St. John's Ambulance, Holy Family Virika Hospital, Mengo  
99 Hospital, Zia Angellina Health Centre, and St. Stephens Hospital.

### 100 **Data collection**

101 We utilized two different methods for data collection. First, we conducted a survey among  
102 pilgrims at the Catholic and Protestant shrines based on signs and symptoms for key priority

103 diseases from June 2–5, 2022. The data collection tool was developed in KoboCollect based  
104 on signs and symptoms for selected priority diseases: COVID-19 and VHFs inclusive of Ebola  
105 Virus Disease, Crimean Congo Hemorrhagic Fever, Yellow Fever, Rift Valley Fever, and  
106 Marburg Hemorrhagic Fever. Signs and symptoms investigated were based on suspect case  
107 definitions as per the National Technical Guidelines for Integrated Disease Surveillance and  
108 Response. Signs and symptoms under investigation were: fever (temperature  $>37.5^{\circ}\text{C}$ ), cough,  
109 flu, headache, generalized body weakness, difficulty in breathing, jaundice, fainting or sudden  
110 collapse, and unexplained bleeding. Any other signs and symptoms reported by the  
111 participants were also recorded by the surveillance officers.

112 We sampled systematically every 10th pilgrim in the line at main entrance gates. Other  
113 pilgrims were selected randomly from demarcated zonal areas. Verbal informed consent was  
114 obtained from participants prior to interviews. Overall, surveillance officers from Makerere  
115 University School of Public Health interviewed 1,350 pilgrims who voluntarily participated in  
116 the survey. Survey data were downloaded in the Excel (.xls) format from the KoboCollect  
117 server and processed for analysis. Second, we conducted records review based on the on-site  
118 emergency medical services provided at the Catholic and Protestant shrines from May 25 to  
119 June 5, 2022. We extracted all the available data on 5,582 pilgrims who sought medical care  
120 from Health Management Information System registers for review including age, sex, district  
121 of residence, signs and symptoms or provisional diagnosis.

## 122 **Data analysis**

123 We conducted univariate data analysis using Epi Info 7 software (CDC, Atlanta, USA) to  
124 obtain frequencies of demographic characteristics and syndromes suggestive of public health  
125 emergencies among pilgrims who participated in the survey or sought care from the medical  
126 tents. Only syndromes suggestive of key priority diseases were of interest to the investigative  
127 team. At analysis phase, a suspected COVID-19 case was defined as  $\geq 2$  signs or symptoms of:  
128 fever  $>37.5^{\circ}\text{C}$ , flu, cough, and difficulty breathing whereas a suspected VHF case was defined

129 as fever  $>37.5^{\circ}\text{C}$  and unexplained bleeding among pilgrims who visited Namugongo Catholic  
130 and Protestant shrines from May 25 to June 5, 2022.

### 131 **Ethical considerations**

132 This investigation was in response to an annually commemorated mass gathering and was  
133 therefore determined to be non-research. The Ministry of Health (MoH) gave the directive to  
134 conduct syndromic surveillance during this religious event. The Office of the Associate  
135 Director for Science, Centres of Disease Control and Prevention/Uganda, also determined  
136 that this activity was not human subject research, and its primary intent was public health  
137 practice or a disease control activity (specifically, epidemic or endemic disease control activity).  
138 Verbal consent in English and the local language was sought from pilgrims before  
139 participation in the survey. They were informed that their participation was voluntary and  
140 their refusal would not result in any negative consequences. Pilgrims were assigned unique  
141 identifiers instead of using their names to protect the confidentiality of the respondents.  
142 Administrative clearance to extract patient data from Health Management Information System  
143 registers was obtained from the Ministry of Health. All methods were performed in  
144 accordance with the approval and administrative clearance.

### 145 **Results**

#### 146 **Characteristics of pilgrims who participated in the survey during the Uganda Martyrs’** 147 **commemoration mass gathering, June 2–5, 2022**

148 Among the 1,350 pilgrims who participated in the survey, 767 (56.8%) were females. Nearly  
149 all pilgrims 1,331 (98.6%) were Ugandans. The majority of pilgrims 1,157 (85.7%) visited the  
150 Catholic shrine (Table 1).

151

152 **Table 1: Characteristics of pilgrims who participated in the survey during the Uganda**  
 153 **Martyrs' commemoration mass gathering, June 2–5, 2022**

| Characteristic                                                                       | Frequency (n = 1,350) | Percentage (%) |
|--------------------------------------------------------------------------------------|-----------------------|----------------|
| <b>Age*</b> <i>*Median age (IQR): 35 (25 – 49)</i> <i>Mean Age (SD): 37.9 (17.6)</i> |                       |                |
| <18 years                                                                            | 85                    | 6.3            |
| 18–29 years                                                                          | 409                   | 30.3           |
| 30–39 years                                                                          | 284                   | 21.0           |
| 40–49 years                                                                          | 237                   | 17.6           |
| ≥50 years                                                                            | 335                   | 24.8           |
| <b>Sex</b>                                                                           |                       |                |
| Male                                                                                 | 583                   | 43.2           |
| Female                                                                               | 767                   | 56.8           |
| <b>Country of residence</b>                                                          |                       |                |
| Uganda                                                                               | 1,331                 | 98.6           |
| Kenya                                                                                | 9                     | 0.7            |
| South Sudan                                                                          | 4                     | 0.3            |
| Rwanda                                                                               | 2                     | 0.2            |
| Democratic Republic of Congo                                                         | 1                     | 0.1            |
| Nigeria                                                                              | 3                     | 0.2            |
| <b>Religious site visited</b>                                                        |                       |                |
| Catholic shrine                                                                      | 1,157                 | 85.7           |
| Protestant shrine                                                                    | 153                   | 14.3           |

154

155 **Characteristics of pilgrims sought medical care from medical tents during the Uganda**

156 **Martyrs' commemoration mass gathering, May 25–June 5, 2022**

157 Among the 5,582 pilgrims who sought medical care from the medical tents 3,901 (70.1%)  
 158 were females whereas 1,521 (27.5%) were aged  $\geq 50$  years (Table 2). Age was not recorded  
 159 among 57 pilgrims who sought medical care from the medical tents.

160 **Table 2: Characteristics of pilgrims who sought medical care from medical tents during the**  
 161 **Uganda Martyrs' commemoration mass gathering, May 25–June 5, 2022**

| Characteristics                                                                    | Frequency (n = 5,582) | Percentage (%) |
|------------------------------------------------------------------------------------|-----------------------|----------------|
| <b>Age* (n = 5,525) *Median age (IQR): 38 (25 - 51) Mean Age (SD): 38.6 (18.0)</b> |                       |                |
| <18 years                                                                          | 726                   | 13.1           |
| 18–29 years                                                                        | 1,143                 | 20.7           |
| 30–39 years                                                                        | 1,051                 | 19.0           |
| 40–49 years                                                                        | 1,084                 | 19.6           |
| $\geq 50$ years                                                                    | 1,521                 | 27.5           |
| <b>Sex</b>                                                                         |                       |                |
| Male                                                                               | 1,668                 | 29.9           |
| Female                                                                             | 3,914                 | 70.1           |
| <b>Chronic illness</b>                                                             |                       |                |
| Diabetes                                                                           | 33                    | 0.6            |
| Hypertension                                                                       | 111                   | 2.0            |

162 **Suspected priority diseases**

163 Among the 1,350 pilgrims who participated in the survey, 653 (48.4%) reported at least one  
 164 sign or symptom during their visit to the Catholic and Protestant shrines. Of these, 236 (18%)  
 165 reported  $\geq 1$  suspected COVID-19 and VHF case definition signs and symptoms and 25 (2%)  
 166 reported  $\geq 2$  symptoms (Figure 1). Twenty-two (1.6%) were suspected COVID-19 cases and  
 167 three (0.2%) were suspected VHF cases from different regions of Uganda, two were bleeding  
 168 from the nose and one had bloody vomitus and urine.

169



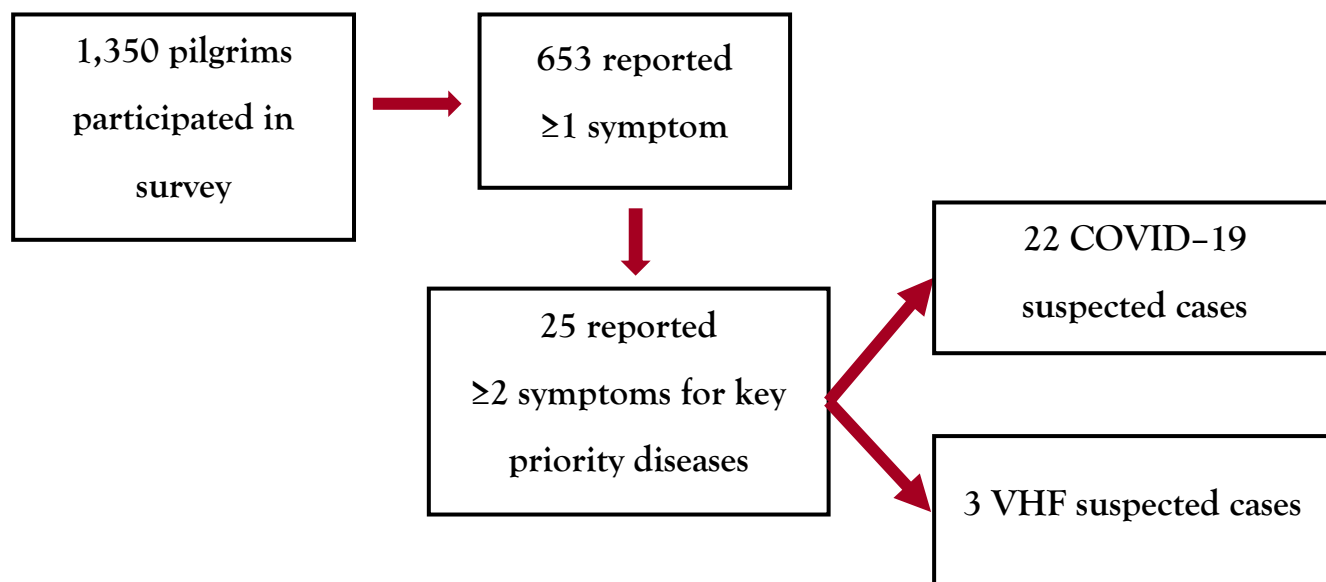

Figure 1: Schema showing suspected priority diseases among pilgrims who participated in the survey during the Uganda Martyrs' commemoration mass gathering, May 25–June 5, 2022

170 Among 5,582 pilgrims who sought care at the medical tents, 3,796 records specified the  
171 presenting signs and symptoms whereas 1,786 records did not have specified signs and  
172 symptoms but only had a provisional diagnosis based on the clinician's assessment. Of 3,796  
173 records, 539 pilgrims reported at least 2 symptoms suggestive of key priority diseases. Of these,  
174 538 (9.6%) had suspected COVID-19 and one had suspected VHF with bloody vomitus  
175 (Figure 2).

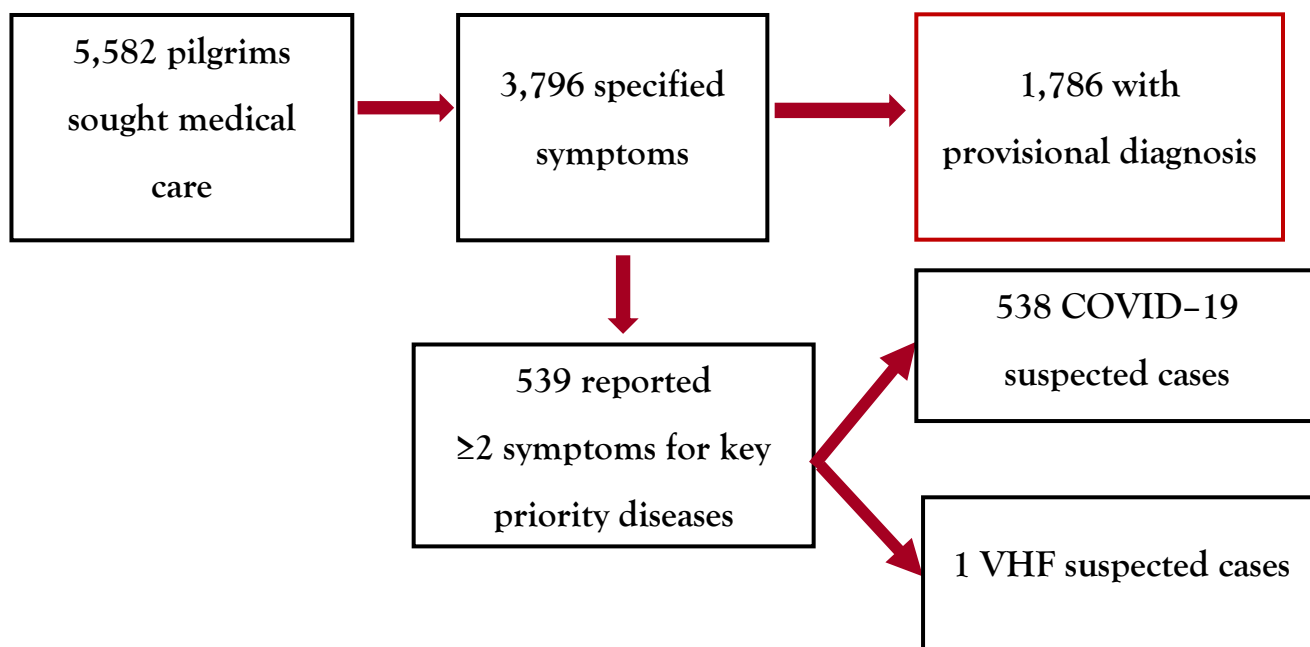

Figure 2: Schema showing suspected priority diseases among pilgrims who sought medical care from medical tents during the Uganda Martyrs' commemoration mass gathering, May 25–June 5, 2022

## 176 Discussion

177 In this study, we described syndromes suggestive of key priority diseases among visiting  
178 pilgrims from May 25–June 5, 2022 to inform future planning for mass gatherings in Uganda.  
179 We identified 4 VHF and 560 COVID-19 suspected cases through syndromic surveillance  
180 during the 2022 Uganda Martyrs' commemoration. Similarly, previous incidences of  
181 outbreaks have been reported following festive, religious and sporting-related mass gatherings  
182 including a COVID-19 outbreak after festivities in Spain; outbreaks of diarrheal diseases  
183 during the 2019 Hijja pilgrimage in Saudi Arabia; mumps following festive activities in Austria  
184 and Spain; measles after an international youth sporting event in United States of America;  
185 meningococcal disease associated with the 23rd World Scout Jamboree gathering in Japan;  
186 and influenza H1N1 outbreaks after music festivals in Belgium and Hungary (1, 10-15). Mass  
187 gatherings have been highly characterized as transmission sites for infectious diseases due to

188 close proximity and rapid and possibility of dissemination of infectious agents after the mass  
189 dispersion to different locations (16).

190 During the COVID-19 pandemic, mass gatherings were highlighted among the sources of  
191 transmission due to overcrowding and close interaction between attendees. In 2020, a social  
192 gathering at Church X provided an opportunity for a COVID-19 superspreading event in  
193 Omoro District, Northern Uganda (17). A recent systematic review reported that religious  
194 gatherings in places of worship were vital in COVID-19 transmission accounting for over 50  
195 worship related clusters especially during the first wave of the pandemic (18). Mass gatherings  
196 have been significantly associated with COVID-19 transmission (10, 19-21). It should also be  
197 noted that risk of transmission of infectious diseases could be partly influenced by the type,  
198 venue, location and demographics of participants who attend the mass gatherings (22-24).  
199 Evidence of COVID-19 transmission during mass gatherings has also been reported in  
200 Malaysia during the Sri Petaling Moslem Missionary Movement (25). Due to such scenarios,  
201 the WHO published interventions which should be implemented to mitigate the spread of  
202 COVID-19 during mass gatherings (26).

203 Limited evidence has been presented on the incidence of VHFs during mass gatherings.  
204 However, there is still need for great vigilance since most VHFs are largely characterized by  
205 person to person transmission which could be highly favored by the close contact between  
206 attendees during mass gatherings. Experience from mass gathering events held during the  
207 West African Ebola epidemic illustrates that these events can be held safely provided  
208 interventions are instituted for enhanced surveillance and response systems for infectious  
209 diseases (27). This underscores the urgent need of implementing effective measures to mitigate  
210 the spread of any VHF during such annual mass gatherings.

211 However, there were only seventeen trained surveillance officers despite the masses at the  
212 Namugongo Protestant and Catholic shrines, who started administering the survey  
213 questionnaire on June 2, 2022 instead of having commenced on the May 25, 2022, at the time

214 when pilgrims started gathering. Therefore, it was difficult to generalize the findings on the  
215 signs and symptoms for selected priority diseases to the entire population that converged  
216 during the 2022 Uganda Martyrs' commemoration. Additionally, 1,786 out of 5,582 records  
217 did not have specified signs and symptoms but only had a provisional diagnosis based on the  
218 clinician's assessment. We could not categorize these pilgrims under any of the key priority  
219 diseases since they did not have specified signs and symptoms; which could have  
220 underestimated the syndromes suggestive of key priority diseases.

## 221 **Conclusion**

222 Almost one in fifty pilgrims at the 2022 Uganda Martyrs' commemoration had symptoms of  
223 COVID-19 or VHF. Overall, we identified 4 Viral Hemorrhagic Fever and 560 COVID-19  
224 suspected cases during the 2022 Uganda Martyrs' commemoration. Unfortunately, none of  
225 the suspected COVID-19 or VHF cases were tested and we do not know what condition they  
226 had. While we have no evidence that the suspected VHF cases had any link to the 2022 Ebola  
227 Virus Disease outbreak in Uganda, it is clear from these findings that a surveillance system at  
228 mass gatherings and the ability to actively respond to possible cases is critical. It is important  
229 for us to prioritize intensified syndromic surveillance during mass gatherings to ensure that we  
230 reduce the risk for an outbreak at mass gatherings in Uganda and reduce the impact if one  
231 should occur. Furthermore, there is utmost need to set up isolation facilities for any suspected  
232 cases and provide laboratory testing capacity to facilitate early detection and response to  
233 priority key diseases that could stem from such events.

## 234 **Acknowledgments**

235 The authors would like to thank medical teams from Ministry of Health, Mulago National  
236 Referral Hospital, St. Francis Hospital Nsambya, Uganda Martyrs Hospital Rubaga, Uganda  
237 People's Defence Forces, Uganda Police Force, Uganda Red Cross Society, St. John's  
238 Ambulance, Holy Family Virika Hospital, Mengo Hospital, Zia Angellina Health Centre, and  
239 St. Stephens Hospital who provided onsite emergency medical services at the Catholic and

240 Protestant shrines. Additional thanks to surveillance officers from Makerere University School  
241 of Public Health (MakSPH) who administered survey questionnaires to pilgrims at the  
242 Catholic and Protestant shrines

### 243 **Funding and disclaimer**

244 This project was supported by President's Emergency Plan for AIDS Relief (PEPFAR) through  
245 US Centers for Disease Control and Prevention Cooperative Agreement number GH001353  
246 through Makerere University School of Public Health. Its contents are solely the responsibility  
247 of authors and do not necessarily represent the official views of US Centers for Disease  
248 Control and Prevention, Department of Health and Human Services, Makerere University  
249 School of Public Health, or Ministry of Health. The staff of the funding body provided  
250 technical guidance in design of the study, ethical clearance and collection, analysis, and  
251 interpretation of data, and writing the manuscript.

### 252 **References**

- 253 1. WHO. Public health for mass gatherings: key considerations. Available from:  
254 [https://apps.who.int/iris/bitstream/handle/10665/162109/WHO\\_HSE\\_GCR\\_2015.5\\_eng.pdf?sequence=1&isAllowed=y](https://apps.who.int/iris/bitstream/handle/10665/162109/WHO_HSE_GCR_2015.5_eng.pdf?sequence=1&isAllowed=y). Accessed on: June 12, 2022.
- 255  
256 2. WHO. International health regulations (2005): Third Edition. Available from:  
257 <file:///C:/Users/HP/Downloads/9789241580496-eng.pdf>. Accessed on: June 12, 2022:  
258 World Health Organization; 2016.
- 259 3. Berry A. Syndromic surveillance and its utilisation for mass gatherings. *Epidemiology &*  
260 *Infection*. 2019;147.
- 261 4. Fleischauer AT, Gaines J. Enhancing surveillance for mass gatherings: the role of  
262 syndromic surveillance. *Public Health Reports*. 2017;132(1\_suppl):95S-8S.
- 263 5. Spector E, Zhang Y, Guo Y, Bost S, Yang X, Prospero M, et al. Syndromic Surveillance  
264 Systems for Mass Gatherings: A Scoping Review. *International journal of environmental*  
265 *research and public health*. 2022;19(8):4673.

- 266 6. Ganeshkumar P, Muthappan S, Ponnaiah M, Virumbhi V, Thangaraj JV,  
267 Muthuperumal P, et al. Syndromic surveillance during religious mass gatherings, southern  
268 India 2015–2018. *Travel Medicine and Infectious Disease*. 2022;47:102290.
- 269 7. Lami F, Hameed I, Jewad AW, Khader Y, Amiri M. Real-time surveillance of infectious  
270 diseases and other health conditions during Iraq’s Arbaenia mass gathering: cross-Sectional  
271 Study. *JMIR public health and surveillance*. 2019;5(4):e14510.
- 272 8. Sokhna C, Goumballa N, Van Thuan Hoang BMM, Dieng M, Sylla AB, Diallo A, et al.  
273 Senegal’s grand Magal of Touba: syndromic surveillance during the 2016 mass gathering. *The*  
274 *American Journal of Tropical Medicine and Hygiene*. 2020;102(2):476.
- 275 9. AFENET. Public Health Surveillance at Namugongo: Martyrs’ Day celebration,  
276 Uganda. Available: [http://www.afenet.net/index.php/world/63-news-events/420-public-](http://www.afenet.net/index.php/world/63-news-events/420-public-health-surveillance-at-namugongo-martyrs-day-celebration-uganda)  
277 [health-surveillance-at-namugongo-martyrs-day-celebration-uganda](http://www.afenet.net/index.php/world/63-news-events/420-public-health-surveillance-at-namugongo-martyrs-day-celebration-uganda). Accessed on: 24th August  
278 2022. 2018.
- 279 10. Domènech-Montoliu S, Pac-Sa MR, Vidal-Utrillas P, Latorre-Poveda M, Del Rio-  
280 González A, Ferrando-Rubert S, et al. Mass gathering events and COVID-19 transmission in  
281 Borriana (Spain): A retrospective cohort study. *PloS one*. 2021;16(8):e0256747.
- 282 11. Karami M, Doosti-Irani A, Ardalan A, Gohari-Ensaf F, Berangi Z, Massad E, et al.  
283 Public health threats in mass gatherings: A systematic review. *Disaster medicine and public*  
284 *health preparedness*. 2019;13(5-6):1035-46.
- 285 12. Nunan D, Brassey J. What is the evidence for mass gatherings during global pandemics?  
286 A rapid summary of best-available evidence. Center for Evidence-Based Medicine (CEBM).  
287 2020.
- 288 13. Rainey JJ, Phelps T, Shi J. Mass gatherings and respiratory disease outbreaks in the  
289 United States—should we be worried? results from a systematic literature review and analysis of  
290 the national outbreak reporting system. *PloS one*. 2016;11(8):e0160378.

- 291 14. Sassano M, McKee M, Ricciardi W, Boccia S. Transmission of SARS-CoV-2 and other  
292 infections at large sports gatherings: a surprising gap in our knowledge. *Frontiers in medicine*.  
293 2020;7:277.
- 294 15. Yezli S, Assiri AM, Alhakeem RF, Turkistani AM, Alotaibi B. Meningococcal disease  
295 during the Hajj and Umrah mass gatherings. *International Journal of Infectious Diseases*.  
296 2016;47:60-4.
- 297 16. Kok J, Blyth CC, Dwyer DE. Mass gatherings and the implications for the spread of  
298 infectious diseases. *Future Microbiology*. 2012;7(5):551-3.
- 299 17. Thiwe P, Amodan D, Kadobera B, Bulage D, Namayanja L, Akusekera J, et al.  
300 Epidemiological assessment of a COVID-19 cluster among attendees of a church activity,  
301 Omoro District, Northern Uganda, September 2020. *UNIPH Bulletin*. 2021;6(3).
- 302 18. Peano A, Bert F, Lo Moro G, Previti C, Scaioli G, Siliquini R. COVID-19 outbreaks  
303 in places of worship worldwide: a systematic review. *European Journal of Public Health*.  
304 2021;31(Supplement\_3):ckab165. 647.
- 305 19. Furuse Y. Risk at mass-gathering events and the usefulness of complementary events  
306 during COVID-19 pandemic. *Journal of Infection*. 2021;82(3):e20-e1.
- 307 20. Suñer C, Coma E, Ouchi D, Hermsilla E, Baro B, Rodríguez-Arias MÀ, et al.  
308 Association between two mass-gathering outdoor events and incidence of SARS-CoV-2  
309 infections during the fifth wave of COVID-19 in north-east Spain: A population-based  
310 control-matched analysis. *The Lancet Regional Health-Europe*. 2022;15:100337.
- 311 21. Yasutaka T, Murakami M, Iwasaki Y, Naito W, Onishi M, Fujita T, et al. Assessment of  
312 COVID-19 risk and prevention effectiveness among spectators of mass gathering events.  
313 *Microbial risk analysis*. 2022:100215.
- 314 22. Ebrahim SH, Memish ZA. COVID-19 -the role of mass gatherings. *Travel medicine*  
315 *and infectious disease*. 2020;34:101617.
- 316 23. Kelvin AA, Halperin S. COVID-19 in children: the link in the transmission chain.  
317 *The Lancet Infectious Diseases*. 2020;20(6):633-4.

- 318 24. Shi P, Keskinocak P, Swann JL, Lee BY. The impact of mass gatherings and holiday  
319 traveling on the course of an influenza pandemic: a computational model. BMC public health.  
320 2010;10(1):1-12.
- 321 25. Che Mat NF, Edinur HA, Abdul Razab MKA, Safuan S. A single mass gathering  
322 resulted in massive transmission of COVID-19 infections in Malaysia with further  
323 international spread. Journal of Travel Medicine. 2020;27(3):taaa059.
- 324 26. WHO. Key planning recommendations for mass gatherings in the context of the  
325 current COVID-19 outbreak: interim guidance, 14 February 2020. World Health  
326 Organization; 2020.
- 327 27. Blumberg L, Regmi J, Endricks T, McCloskey B, Petersen E, Zumla A, et al. Hosting of  
328 mass gathering sporting events during the 2013–2016 Ebola virus outbreak in West Africa:  
329 experience from three African countries. International Journal of Infectious Diseases.  
330 2016;47:38-41.
